# Supplementary material
Source: Research Square preprint supplement (doi:10.21203/rs.3.rs-9106203/v1)
Supplement: Supplementary file 1 [file c1fcf646852205a3869f0404.docx]

Supplementary Information

**Supplementary Methods**

***Additional details on HARP assumptions and corrections***

*HARP* assumes Hardy-Weinberg Equilibrium (HWE). Typically, deviation to HWE due to high coancestry between individuals (e.g. as a result of population structure or individual relatedness) is corrected for in DNA profiling using theta (*θ*) [1]. However, when only considering heterozygote matches, the use of theta is less conservative; i.e. when *θ*>0, *P*(AB) < 0.5. Hence, to be conservative, we assume *θ*=0, though *θ* can be incorporated into *HARP* if justifiable value is available for a given study system (e.g. if assumptions of high coancestry are warranted).

Although heterozygote deficiency is a more prominent issue than heterozygote excess (hence the typical correction using *θ*), the latter can still arise. Heterozygote excess is more relevant to *HARP* as it will result in underestimating heterozygote match probabilities. Such scenarios include:

- heterozygote advantage, where heterozygote individuals have a fitness advantage over homozygotes.
- deleterious recessive alleles, causing a deficit in homozygote recessive individuals, thereby inflating the number of heterozygotes and dominant allele homozygotes in the population.
- advantageous dominant alleles, causing an increase in heterozygotes and dominant allele homozygotes in the population.
- disassortative mating, favouring unions between opposite homozygote genotypes, leading to an excess of heterozygote offspring.

Of the scenarios outlined above, purifying selection is expected to be by far the most prevalent, whereby deleterious recessive homozygotes are selectively removed from the population. Estimates of the proportion of the human genome potentially subject to purifying selection vary across studies (3-9% [2,3]). Further, these scenarios will affect specific genomic regions, not genome-wide heterozygosity. Since it is not possible to test for HWE deviations on a per-marker basis in the absence of population genetic data, for the case studies we conservatively assume that said selection scenarios affect 10% of markers (i.e. *s*=0.1). Where marker information is available, and the loci have been shown to be unaffected by such selection, *s*=0 could be applied instead. A false heterozygote error rate (resulting in false matches) could also be incorporated into *s*.

*HARP* also assumes linkage disequilibrium (LD) to justify calculation of cumulative probabilities across independent markers. A possible extension to *HARP* could retain dependant markers and explicitly incorporate linkage information (e.g. [4]). However, for the applications we present here, markers were filtered appropriately to minimise the chance of LD; consequently, some information on marker locality and/or LD testing is required, which can be obtained from a genome assembly (e.g. see the hippopotamus poaching case study).

***Bioinformatic pipeline for hypothetical hippopotamus case study***

For the hypothetical hippopotamus poaching case study, we utilised six whole genome Illumina sequencing datasets from Árnason *et al.* [5] and Bergeron *et al.* [6]. The three datasets from Árnason et al. [5] were generated from different libraries of the same individual hippo (GenBank Accession numbers: SRR5663646, SRR5663647 and SRR5663649), while the three datasets from Bergeron et al. [6] were from a trio (father, mother and offspring; GenBank Accession numbers: SRR17072457, SRR17072459 and SRR17072472), representing samples that can be difficult to distinguish via DNA profiling due to their high relatedness. During our analyses, we inadvertently identified that one of the hippos in the Bergeron *et al.* [6] trio (SRR17072459) was the same individual represented by the three ‘replicate’ datasets from Árnason *et al.* [5] (confirmed by a co-author who had contributed samples to both studies). This resulted in four replicates from the same individual for our analyses. These datasets corresponded to the samples in the hypothetical hippo poaching case (Supplementary Table S1).

We carried out pairwise comparisons of SNPs between each of the six datasets. The bioinformatic pipeline and scripts used are available on GitHub (https://github.com/KyleEwart/HARP_WGS_pipeline). First, to standardise the variant calling and subsequent comparisons, we randomly downsampled each paired raw sequencing dataset to ~10x coverage (based on a 3.1 Gb genome size) using seqtk v1.4 (https://github.com/lh3/seqtk). Second, reads were trimmed for quality and adatpters were removed using the BBDuk tool in BBMap v38.84 [7]. Third, the trimmed reads were mapped to a hippo genome assembly (GCA_030028035.1) with bwa mem v0.7.18 [8]. Fourth, PCR duplicates, multi-mappers, and reads with ≥15 bp of soft-clipped sequence (representing potential alignment artefacts) were removed using samtools v1.20 [9], and sequencing depth was assessed using mosdepth v0.3.3 [10]. Fifth, SNPs were called using FreeBayes v1.3.2 [11], implementing a minimum coverage of 8 and a minimum alternate allele fraction set of 0.1. For each alignment, FreeBayes was used to generate both a VCF and a gVCF for subsequent comparisons.

Lastly, the VCF and gVCF outputs were compared between samples. Both the VCF and gVCF files underwent stringent filtering using bcftools v1.11 [9]: only biallelic SNPs were retained, with a quality score >30, depth ≥12, alternate allele frequency >0.3, and mapping quality ≥40 (for both the reference and alternate alleles). We also implemented a conservative maximum coverage filter (SNPs with depth >14 were removed) to ensure false heterozygote calls caused by erroneously collapsed paralogs were excluded. Homozygote calls were removed if ≥1 read supported an alternate allele. Then, only heterozygotes were retained in the VCF, and the corresponding sites were extracted from the gVCF of the other sample being compared. SNPs in the resultant VCF were filtered based on their locality within repeat regions. We utilised RepeatModeler v2.0.1 [12] and RepeatMasker v4.0.6 [13] to generate a repeat database and produce a BED file specifying repeat regions. We then used bcftools to remove SNPs located in these repeat regions. To minimise the chance of linkage disequilibrium, we retained a single SNP near the midpoint of the longest scaffolds in the hippopotamus genome. To do this, we identified scaffolds >1 Mb in length (*n*=41) and produced a BED file specifying regions 500 kb from each scaffold end (thereby ensuring SNPs were at >1 Mb distant from one another). We then utilised bcftools and an awk function to retain the SNP nearest to the midpoint of each region specified in this BED file.

This pipeline produced two VCF files per pairwise comparison as the VCF for each sample was compared to the gVCF in all other samples, and vice versa. We retained the VCF/gVCF combination that yielded the highest number of SNP comparisons.

**Expected number of matching heterozygotes for snow leopard and bigleaf maple profiles**

We calculated the expected number of matching heterozygotes for two existing DNA profiling systems for snow leopard [14] and bigleaf maple [15] based on reported heterozygosity and missingness of the marker panels. For the 144 SNP panel for snow leopards, published by Solari *et al.* [14], we used an observed heterozygosity of 0.32 (from Figure 2F in [14]) and a non-missingness proportion of 0.57. Solari *et al*. [14] ran multiple replicates per sample, therefore we based our non-missingness estimate on the replicate with the highest number of genotyped SNPs (from Table S3 in [14]), assuming that profiles were not merged across replicates. To be conservative, we further assumed that missingness was randomly distributed across loci within each profiling run. Therefore:

Here, ‘overlapping’ is referring to genotyped markers common to two independently produced individual profiles. Hence:

For the 131-locus panel for bigleaf maple, published by Dormontt *et al.* [15], we excluded the 3 indel markers (therefore retained 128 SNPs), and used an observed heterozygosity of 0.344 (based on Table S3 in [15]) and a non-missingness proportion of 95%. As Dormontt *et al.* [15] employed a minimum locus-pass rate of 95%, we conservatively assumed that the two profiles being compared were at this minimum call rate.Therefore:

Hence:

**Supplementary Information Tables**

**Supplementary Table S1.** Details on the datasets used in the hippopotamus hypothetical poaching case study.

| **GenBank Accession** | **Source** | **Individual in hypothetical case** |
| --- | --- | --- |
| SRR5663646 | Árnason *et al*. [5] | Hippo A - carcass |
| SRR5663647 | Árnason *et al*. [5] | Hippo A – canine |
| SRR5663649 | Árnason *et al*. [5] | Hippo A – blood spot on machete |
| SRR17072459 | Bergeron *et al*. [6] | Hippo A - blood spot on clothing |
| SRR17072457 | Bergeron *et al*. [6] | Hippo B |
| SRR17072472 | Bergeron *et al*. [6] | Hippo C |

**Supplementary Information References**

1. National Research Council Ii, National Research Council Committee on DNA Forensic Science, The Evaluation of Forensic DNA Evidence. 1996, Washington, D.C.: National Academy Press.
2. Lindblad-Toh, K., et al. A high-resolution map of human evolutionary constraint using 29 mammals. *Nature* **478,** 476-482 (2011).
3. Rands, C. M., Meader, S. Ponting, C. P. & Lunter, G. 8.2% of the human genome is constrained: variation in rates of turnover across functional element classes in the human lineage. *PLoS Genet.* **10,** e1004525 (2014).
4. Vohr, S. H., Buen Abad Najar, C. F., Shapiro, B. & Green, R. E. A method for positive forensic identification of samples from extremely low-coverage sequence data. *BMC Genom.* **16,** 1034 (2015).
5. Árnason, Ú., Lammers, F., Kumar, V., Nilsson, M. A. & Janke, A. Whole-genome sequencing of the blue whale and other rorquals finds signatures for introgressive gene flow. *Sci. Adv.* **4,** eaap9873 (2018).
6. Bergeron, L. A. et al. Evolution of the germline mutation rate across vertebrates. *Nature* **615,** 285-291 (2023).
7. Bushnell, B. BBTools package. <https://sourceforge.net/projects/bbmap/> (2014).
8. Li, H. & Durbin, R. Fast and accurate short read alignment with burrows-wheeler transform. *Bioinformatics* **25,** 1754-1760 (2009).
9. Danecek, P., et al. Twelve years of SAMtools and BCFtools. *GigaScience* **10,** giab008 (2021).
10. Pedersen, B. S. & Quinlan, A. R. Mosdepth: quick coverage calculation for genomes and exomes. *Bioinformatics* **34,** 867-868 (2018).
11. Garrison, E. & Marth, G. Haplotype-based variant detection from short-read sequencing. Preprint at arXiv [https://doi.org/10.48550/arXiv.1207.3907] (2012).
12. Flynn J. M., et al. RepeatModeler2 for automated genomic discovery of transposable element families. *Proc. Natl. Acad. Sci. U.S.A.* **117,** 9451-9457 (2020).
13. Smit, A., Hubley, R. & Green, P. RepeatMasker Open-4.0. Retrieved from <http://www.repeatmasker.org> (2015).
14. Solari, K. A., et al. Next‐generation snow leopard population assessment tool: multiplex‐PCR SNP panel for individual identification from faeces. *Mol. Ecol. Resour.* **24,** e14074 (2024).
15. Dormontt, E. E., et al. Forensic validation of a SNP and INDEL panel for individualisation of timber from bigleaf maple (*Acer macrophyllum* Pursch). *Forensic Sci. Int. Genet.* **46,** 102252 (2020).
